# Supplementary material for: Multinuclear Ru(ii) and Ir(iii) decorated tetraphenylporphyrins as efficient PDT agents
Source: Royal Society of Chemistry journal article supplement (doi:10.1039/c9bm00192a), 2019-01-01
Supplement: c9bm00192a1.pdf [file c9bm00192a1.pdf]

## Electronic Supporting Information (ESI)

### Multinuclear Ru(II) and Ir(III) decorated tetraphenylporphyrins as efficient PDT agents

Justo Cabrera-González,<sup>a</sup> Jorge Soriano,<sup>b</sup> Robert Conway-Kenny,<sup>a</sup> Junsu Wang,<sup>a,c</sup> Yue Lu,<sup>a</sup> Jianzhang Zhao,<sup>c</sup> Carme Nogué,<sup>\*b</sup> and Sylvia M. Draper<sup>\*a</sup>

#### Contents:

|              |                                                                                                                                                                                                                                                                             |
|--------------|-----------------------------------------------------------------------------------------------------------------------------------------------------------------------------------------------------------------------------------------------------------------------------|
| Fig. SChem1: | <sup>1</sup> H NMR spectra in acetone-d <sub>6</sub> of a) <b>P-1</b> , b) <b>P-Ru</b> and c) <b>P-Ir</b> .                                                                                                                                                                 |
| Fig. SChem2: | FTIR-ATR spectra of a) <b>P-Ru</b> and b) <b>P-Ir</b> .                                                                                                                                                                                                                     |
| Fig. SChem3  | <sup>13</sup> C{ <sup>1</sup> H} NMR spectra in acetone-d <sub>6</sub> of <b>P-Ru</b> .                                                                                                                                                                                     |
| Fig. SChem4  | <sup>13</sup> C{ <sup>1</sup> H} NMR spectra in acetone-d <sub>6</sub> of <b>P-Ir</b> .                                                                                                                                                                                     |
| Fig. SChem5  | MALDI-TOF HRMS of a) <b>P-Ru</b> and b) <b>P-Ir</b> .                                                                                                                                                                                                                       |
| Fig. SChem6  | 2D DOSY spectrum of <b>P-1</b> in acetone-d <sub>6</sub> at 298K.                                                                                                                                                                                                           |
| Fig. SChem7  | 2D DOSY spectrum of <b>P-Ru</b> in acetone-d <sub>6</sub> at 298K.                                                                                                                                                                                                          |
| Fig. SChem8  | 2D DOSY spectrum of <b>P-Ir</b> in acetone-d <sub>6</sub> at 298K.                                                                                                                                                                                                          |
| Fig. SPhoto1 | UV/Vis absorption and emission data of (top) <b>P-Ru</b> and (bottom) <b>P-Ir</b> in H <sub>2</sub> O/DMSO solvent mixtures.                                                                                                                                                |
| Fig. SPhoto2 | Triplet lifetime decay traces of a) <b>P-Ru</b> ( $\lambda_{\text{exc}} = 450 \text{ nm}$ , $\lambda_{\text{detection}} = 435 \text{ nm}$ ) and b) <b>P-Ir</b> ( $\lambda_{\text{exc}} = 410 \text{ nm}$ , $\lambda_{\text{detection}} = 430 \text{ nm}$ ).                 |
| Fig. SBio1   | Nuclear morphologies after irradiation.                                                                                                                                                                                                                                     |
| Fig. SBio2   | Living SKBR-3 cells incubated with 2 $\mu\text{M}$ <b>P-Ru</b> (a-d) or 1 $\mu\text{M}$ <b>P-Ir</b> (e-h) for 24 h and observed under Confocal Laser Scanning Microscope (CLSM) (a, c, e and g, insets at higher magnification) or bright field microscope (b, d, f and h). |
| Fig. SBio3   | Intracellular location of <b>P-Ru</b> and <b>P-Ir</b> , (0.5 $\mu\text{M}$ ) analyzed by Confocal Laser Scanning Microscope (CLSM).                                                                                                                                         |

<sup>a</sup> School of Chemistry, Trinity College Dublin, College Green, Dublin 2, Ireland. E-mail: smdraper@tcd.ie

<sup>b</sup> Departament de Biologia Cel·lular, Fisiologia i Immunologia, Universitat Autònoma de Barcelona, E-08193-Bellaterra, Barcelona, Spain E-mail: carme.nogues@uab.cat

<sup>c</sup> State Key Laboratory of Fine Chemicals, Dalian University of Technology, E208 Western Campus, 2 Ling-Gong Road, Dalian 116012, P. R. China.

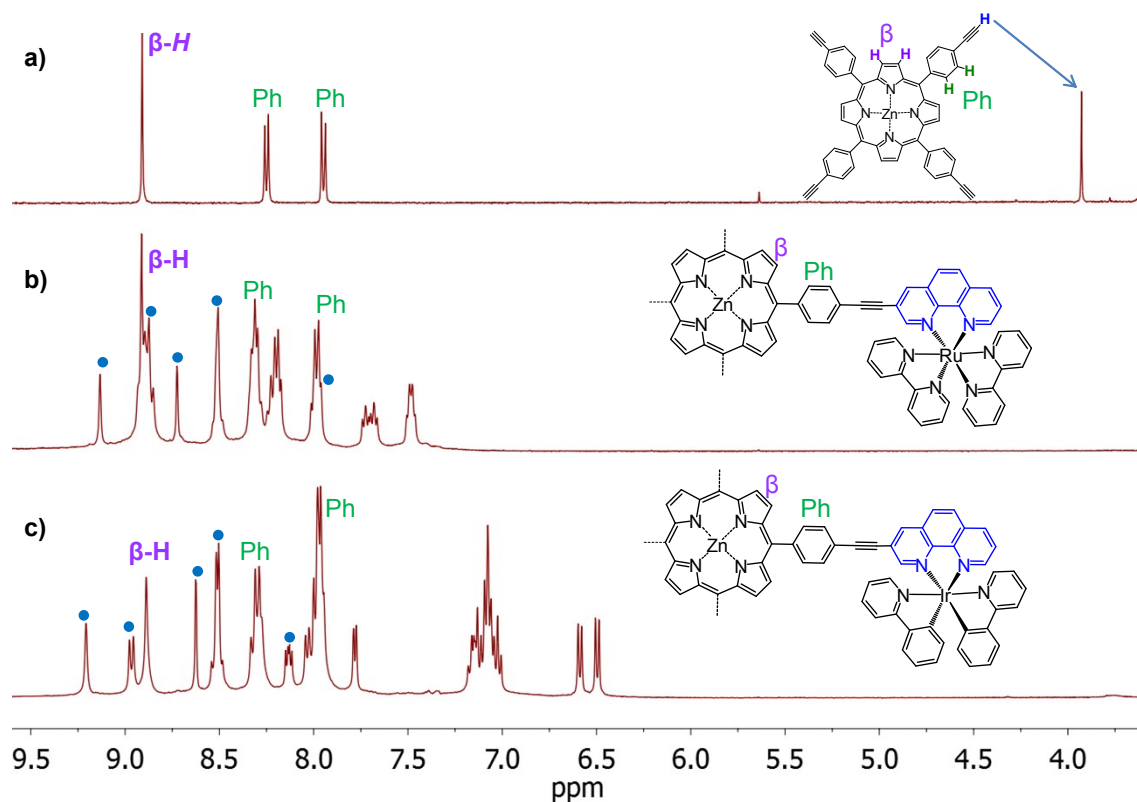

**Fig. SChem1**  $^1\text{H}$  NMR spectra in acetone- $\text{d}_6$  of a) **P-1**, b) **P-Ru** and c) **P-Ir**.

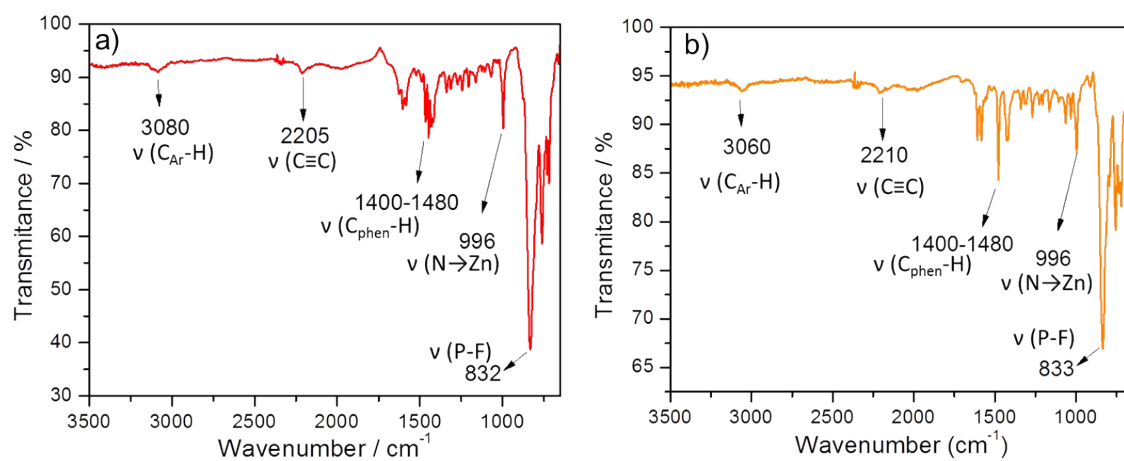

**Fig. SChem2** FTIR-ATR spectra of a) **P-Ru** and b) **P-Ir**.

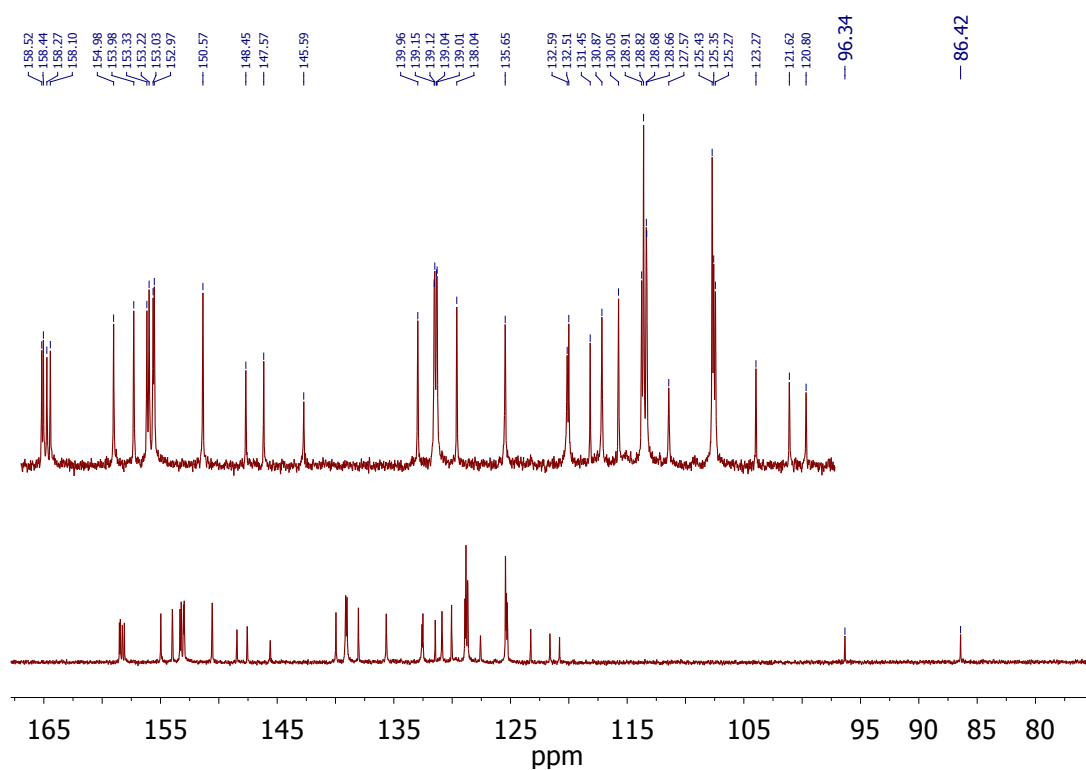

Fig. SChem3  $^{13}\text{C}\{^1\text{H}\}$  NMR spectra in acetone- $\text{d}_6$  of P-Ru.

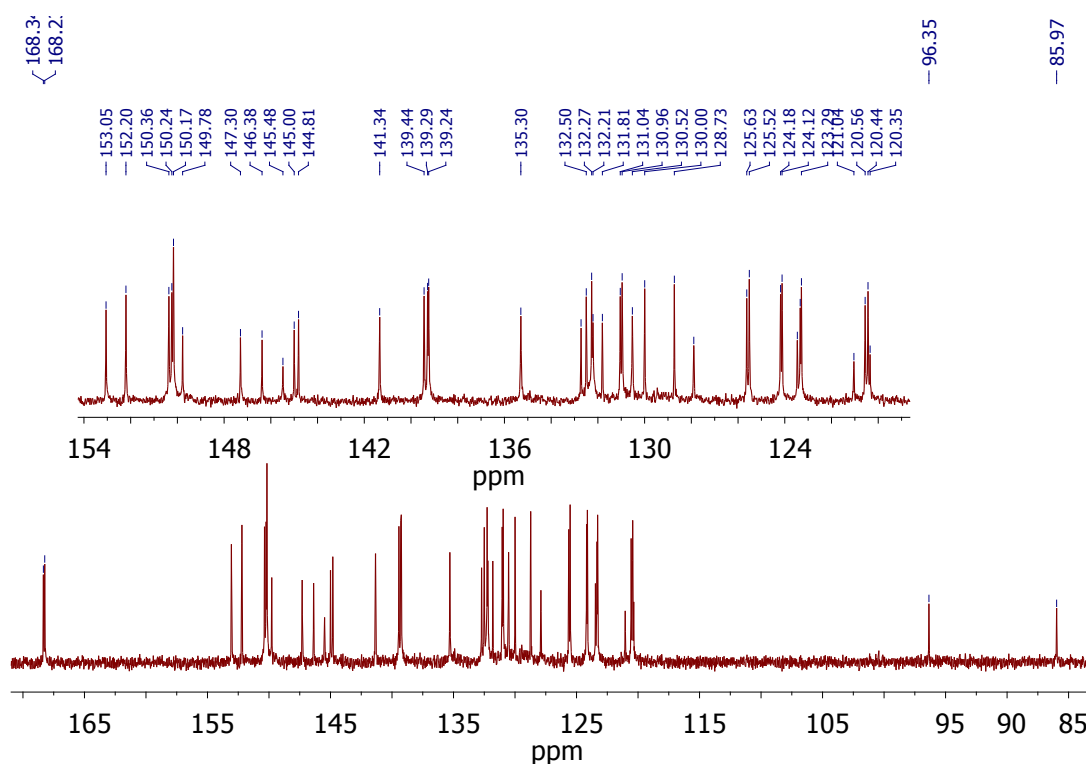

Fig. SChem4  $^{13}\text{C}\{^1\text{H}\}$  NMR spectra in acetone- $\text{d}_6$  of P-Ir.

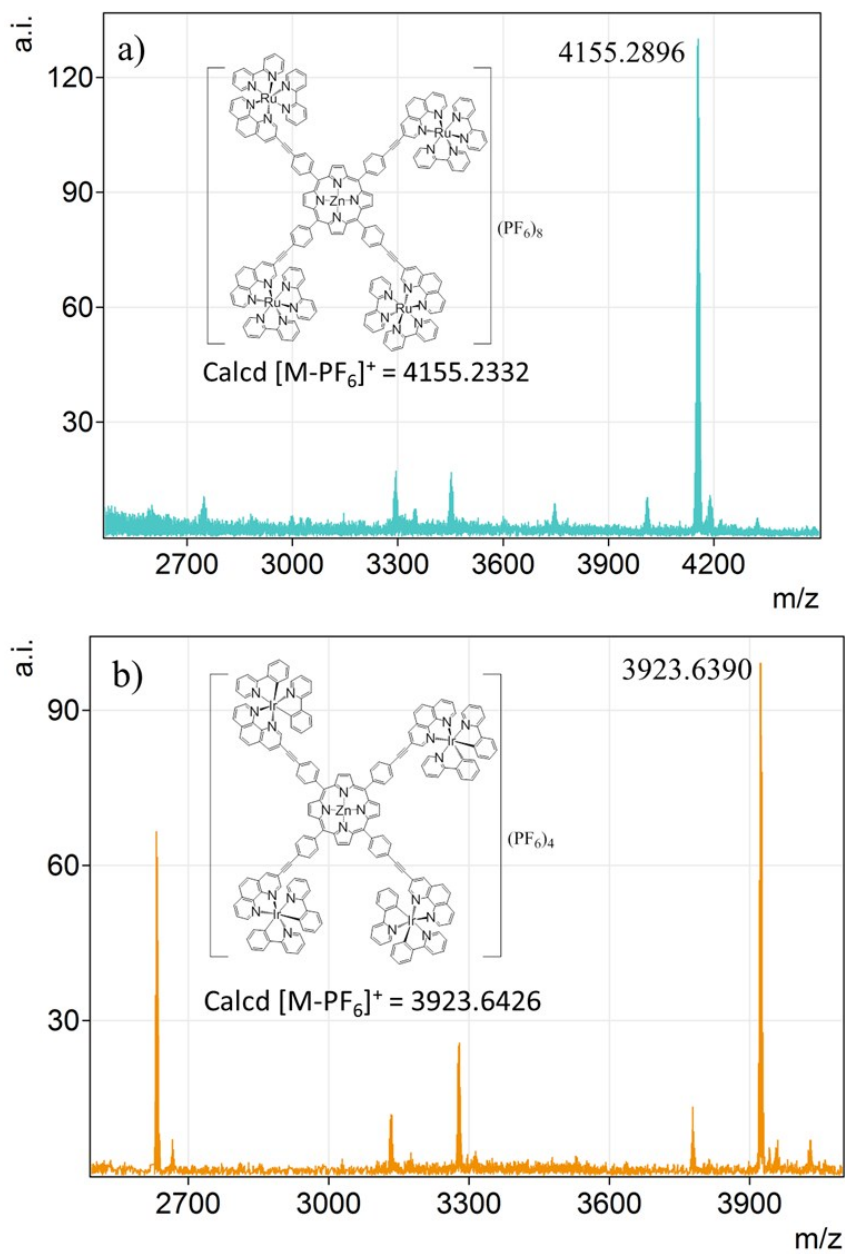

**Fig. SChem5** MALDI-TOF HRMS of a) **P-Ru** and b) **P-Ir**.

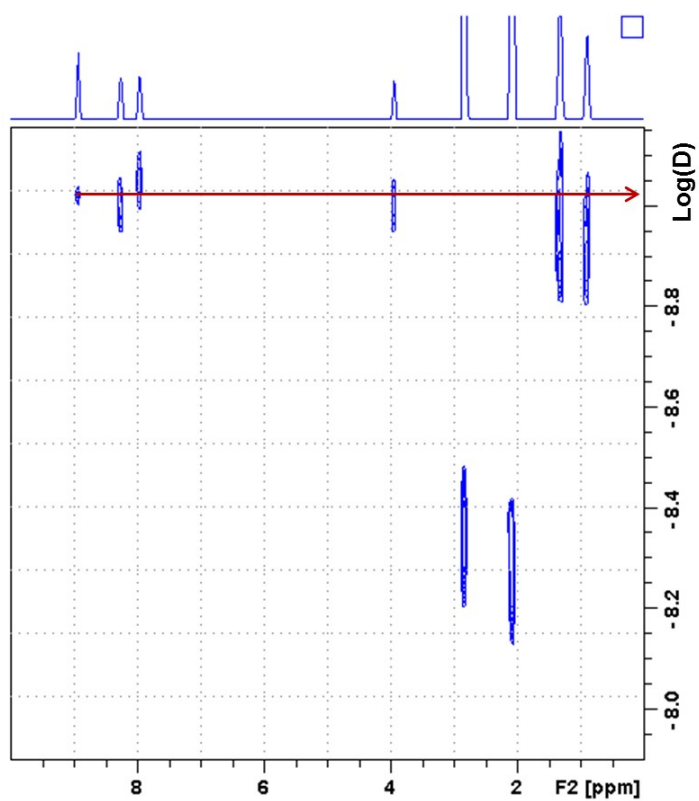

Fig. SChem6 2D DOSY spectrum of **P-1** in acetone- $d_6$  at 298K.

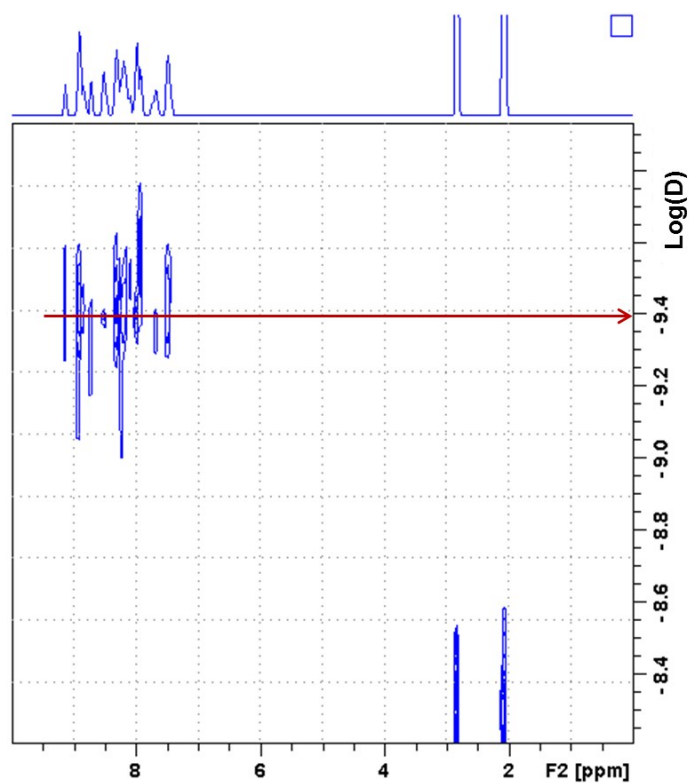

Fig. SChem7 2D DOSY spectrum of **P-Ru** in acetone- $d_6$  at 298K.

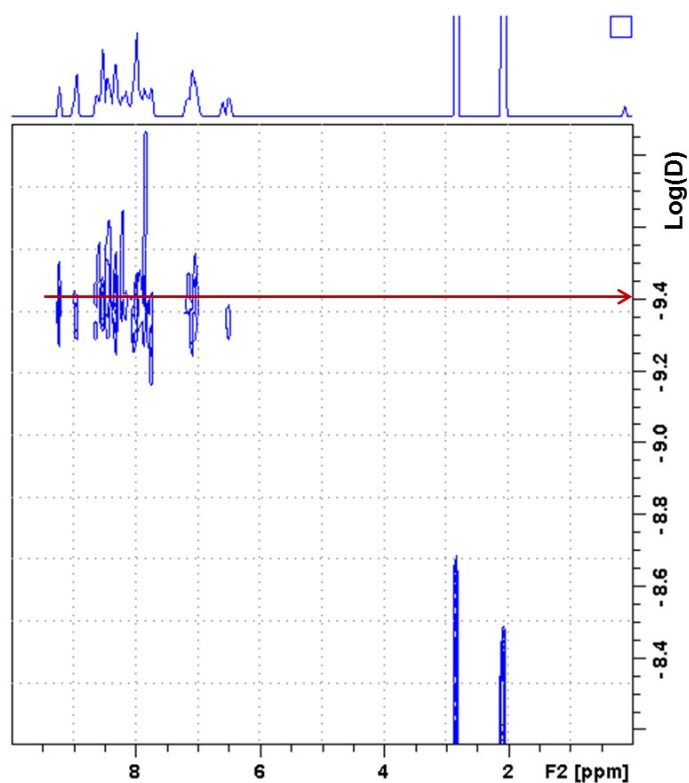

Fig. SChem8 2D DOSY spectrum of P-Ir in acetone-d<sub>6</sub> at 298K.

## P-Ru

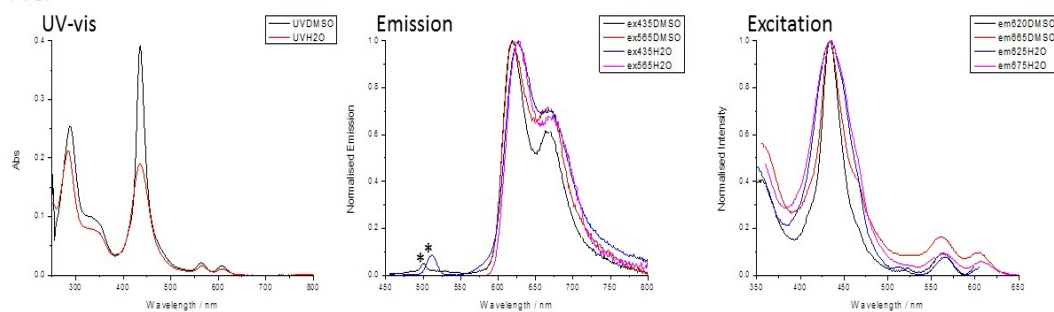

## P-Ir

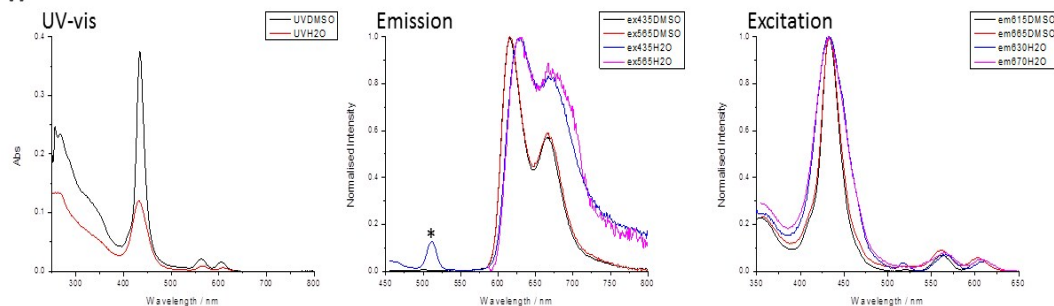

Fig. SPhoto1 UV/Vis absorption and emission data of (top) P-Ru and (bottom) P-Ir in H<sub>2</sub>O/DMSO solvent mixtures.

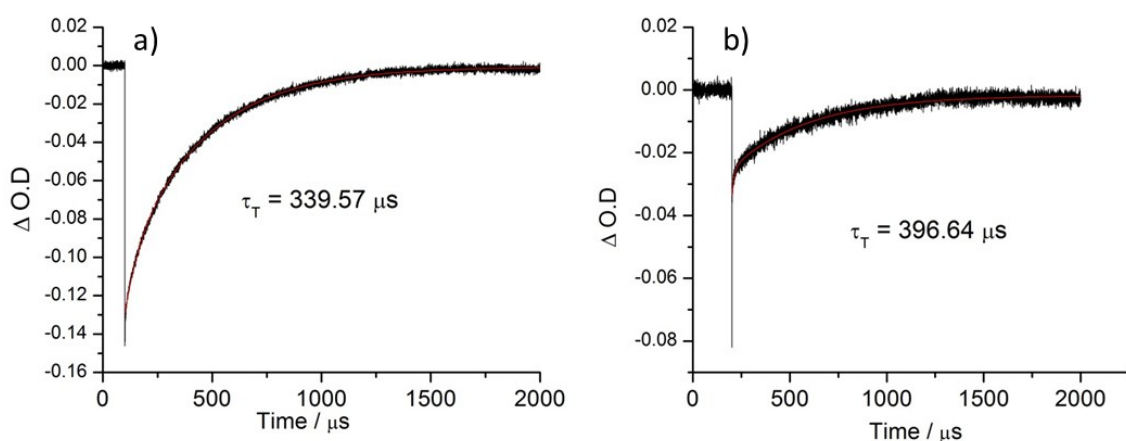

**Fig. SPhoto2** Triplet lifetime decay traces of a) **P-Ru** ( $\lambda_{exc} = 450$  nm,  $\lambda_{detection} = 435$  nm) and b) **P-Ir** ( $\lambda_{exc} = 410$  nm,  $\lambda_{detection} = 430$  nm).

#### Additional Biological Experimental data:

##### Nuclear morphology

Nuclear changes were evaluated using Hoechst staining that specifically stains DNA. Nuclear morphology is related to different kind of cell deaths. Unaltered nuclei are usually oval and relatively big (green arrows). Necrotic nuclei present small round shape and are highly pyknotic (yellow arrows), while fragmented nuclei (red arrows) correspond to apoptotic cells.

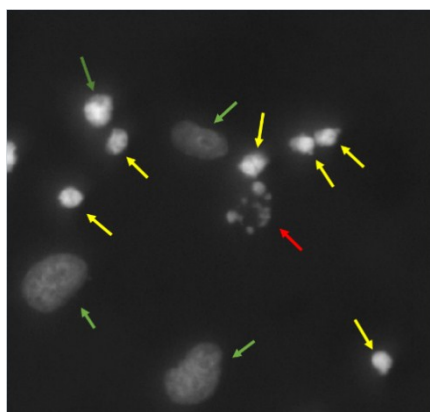

**Fig. SBio1** Nuclear morphologies of SKBR3 cells incubated with **P-Ir** (0.5  $\mu M$ ) after irradiation. Three different morphologies were observed after Hoechst staining. Unaltered nuclei (green arrows) usually oval and relatively big; necrotic nuclei: small round shape and highly pyknotic nucleus (yellow arrows) and apoptotic nuclei: fragmented nuclei (red arrows).

### Live Subcellular localization

Cells were seeded in 3.5 mm diameter glass bottom dishes (MatTek) at a density of  $3 \times 10^5$  cells per dish. At 24 h after seeding, different concentrations of **P-Ru** or **P-Ir** (1 and 2  $\mu\text{M}$ ) were added. After 24 h incubation, the cells were washed three times with HBSS, maintained in fresh culture medium, and directly observed under a Confocal Laser Scanning Microscope (CLSM, Olympus XT7). The PS were activated via excitation using a 405 nm laser of the CLSM for 1 min. The emission, between 600 and 700 nm, was used to observe the subcellular relocation of the PS after its activation.

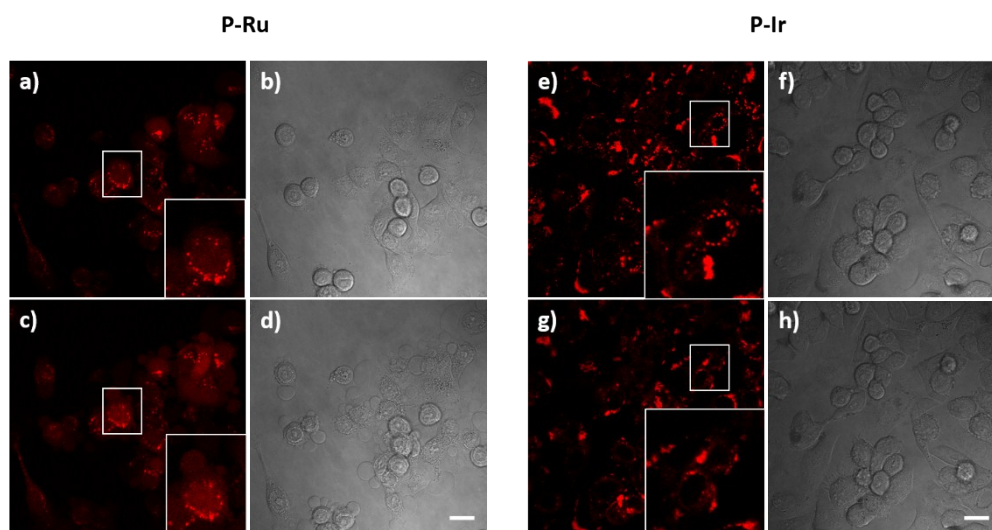

**Fig SBio 2.** Live SKBR-3 cells incubated with 2  $\mu\text{M}$  **P-Ru** (a-d) or 1  $\mu\text{M}$  **P-Ir** (e-h) for 24 h and observed under CLSM. To analyse the localisation of the PSs, bright field (b, d, f and h) or fluorescence mode was used (a, c, e and g). PS fluorescence emission was detected in the range of 600-700 nm by exciting the cells for a few seconds using the 405 nm laser (a, e). Then, the cells were excited for a minute using the same wavelength (405 nm) to evaluate the relocation of the PSs. Scale bar, 20  $\mu\text{m}$ . Insets correspond to higher magnification of the framed cells.

### Fixed cells subcellular localization

In order to confirm the lysosome localization of the PSs, we fixed the cell culture after it had been incubated with the PSs for 24 h. We performed an immunodetection of LAMP-1, a protein specific of the lysosome membrane. The cell membranes were stained with concanavalin A and the cell nuclei with Hoechst. Confocal 3D reconstruction allowed performing orthogonal projections of the z-stacks.

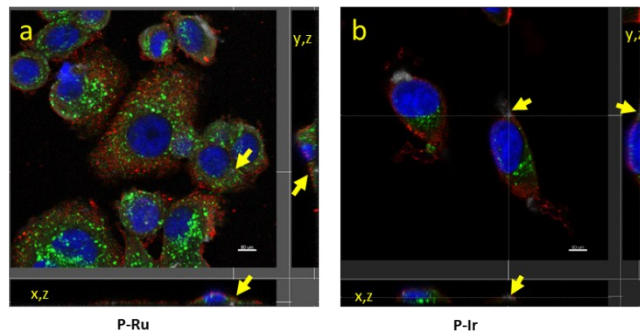

**Fig. SBio3** Intracellular location of **P-Ru** (a) and **P-Ir** (b), analyzed by Confocal Laser Scanning Microscope (CLSM). Orthogonal projections of z-stacks of SKBR-3 cells incubated with 0.5  $\mu$ M of PSs. a) **P-Ru** colocalize (yellow arrow) with LAMP-1 marker (x,z and x,y). b) **P-Ir** is adhered (yellow arrow) to the plasma membrane (x,z and x,y). Membrane is labelled with concanavalin A (red), lysosome marker LAMP-1 (green), nuclei (blue) and PSs (white).
